# Supplementary material
Source: PubMed Central journal article supplement (PMC4827888)
Supplement: kccy-14-18-989114-s001.pdf [file kccy-14-18-989114-s001.pdf]

## SUPPLEMENTARY MATERIAL

### Supplementary Figures

#### Supplementary Figure S.1. YAC genetic rescue strategy.

Male WT, *Fmr1* KO and *Fmr1* KO/YAC (or YAC rescue) mice were obtained by crossing females heterozygous for the *Fmr1* mutation (*Fmr1*<sup>+/-</sup>), to male WT/YAC transgenic mice<sup>27</sup>. + and – indicate presence or absence of the *Fmr1* mutation or YAC transgene. Y represents the Y chromosome.

#### Supplementary Figure S.2. *In silico* identification of quadruplex forming G-rich sequences in the 3'UTR of GABA<sub>A</sub> receptor $\alpha_1$ and $\delta$ subunit mRNA.

Putative quadruplex forming G-rich sequences (QGRS) were identified using an *in silico* tool (<http://bioinformatics.ramapo.edu/QGRS2/index.php>) and are indicated in grey background. The G-rich part of the GABA<sub>A</sub> receptor  $\alpha_1$  3'UTR is indicated with a grey box.

#### Supplementary Figure S.3. Ganaxolone modulates explorative behaviour in the open field

Vehicle (0 mg/kg body weight, VEH) or ganaxolone (10 mg/kg, GAN) was administered to *Fmr1* KO mice (grey bars) and WT littermates (white bars). Significant differences between the groups were detected in (A) the total distance travelled in the open field ( $p=0.003$ , one-way ANOVA; post-hoc Bonferroni t-test), (B) the distance travelled in the periphery ( $p=0.008$ , Kruskal-Wallis; post-hoc Dunn's test), (C) the distance travelled in the corners ( $p=0.008$ , Kruskal-Wallis; post-hoc Dunn's test), (D) the duration in the corners ( $p=0.035$ , Kruskal-Wallis; post-hoc Dunn's test). Overall, ganaxolone treatment did not have a significant effect on explorative behaviour in *Fmr1* KO and WT mice. No significant differences were observed for the other parameters (i.e. number of entries in the centre circle and number of entries in the corners, data not shown). \*\*  $p<0.01$ ; \* $p<0.05$ .  $n=17-21$ /group.

#### Supplementary Figure S.4. Ganaxolone does not affect overall cage activity

Vehicle (0 mg/kg body weight) or ganaxolone (10 mg/kg) was administered to *Fmr1* KO mice (A and B, respectively) and WT littermates (C and D, respectively). No significant differences were found in total activity counts ( $p=0.768$ , Kruskal-Wallis), nor during the first 30 min ( $p=0.497$ , Kruskal-Wallis), nor during the last 30 min ( $p=0.718$ , Kruskal-Wallis test). Analysis of the activity pattern indicates a significant decline in activity over time (effect group  $p=0.739$ , effect time  $p<0.001$ ; effect group x time  $p=0.073$ , two-Way repeated-measures ANOVA). Error bars indicate SEM.  $n=17-21$  /group.

## Supplementary Tables

**Supplementary Table S.1. Primer sequences used in quantitative real-time PCR experiments with SYBR Green**

| Gene                         | F-primer (5' → 3')         | R-primer (5' → 3')         |
|------------------------------|----------------------------|----------------------------|
| <i>Gabra1</i> ( $\alpha_1$ ) | GCCCTCCCAAGATGAACTTA       | CTCTCCCAAACCTGGTCTCA       |
| <i>Gabra2</i> ( $\alpha_2$ ) | ACCATGAGGCTTACAGTCCA       | TTTCAGTGGGCATGAATGAG       |
| <i>Gabra3</i> ( $\alpha_3$ ) | GATCTCACAGGTCTTCAAGTTGC    | ACAACCTCTGGTCACATAAAAAGTGC |
| <i>Gabrb1</i> ( $\beta_1$ )  | GAGTTCACAACAGGGGCATA       | GACACCCAGGACAGGATTGT       |
| <i>Gabrb2</i> ( $\beta_2$ )  | GTGTCAATGACCCTAGTAATATGTCC | TCTGGTCTCAGACGAATGTCA      |
| <i>Gabrd</i> ( $\delta$ )    | GGAGGTGCTCCTGTGAATGT       | GGTGTATTCCATGTTTGCCTCT     |
| <i>Gabrg1</i> ( $\gamma_1$ ) | CCCTGGGTATCACTACGGTTT      | AGAGATCCATTGCTGTCACG       |
| <i>Gabrg2</i> ( $\gamma_2$ ) | AGTGAAGACAACCTTCTGGTGAC    | GACAGTAGTGATTCTAAAGATG     |
| <i>Abat</i> (GABA-T)         | CTCGTTCAACAGCCTCAGAA       | GACTCCTGGAGCTTGCCAC        |
| <i>Gad2</i> (Gad65)          | AACCAGTCTGCTGCTAATCCA      | GCAATTAACAGGGCATCC         |
| <i>Gad1</i> (Gad67)          | GGTGGAGCGATCAAATGTCT       | GCACAGAGACCGACTTCTCC       |
| <i>Fmr1</i>                  | CCGAACAGATAATCGTCCACG      | ACGCTGTCTGGCTTTTCCTTC      |

**Supplementary Table S.2. Reference gene stability in *Fmr1* KO experiments**

| Brain region | Reference gene | CV <sup>A</sup> | M (geNorm) <sup>B</sup> |
|--------------|----------------|-----------------|-------------------------|
| Cortex       | <i>Ap3d1</i>   | 0.142           | 0.327                   |
|              | <i>Cdc40</i>   | 0.096           | 0.249                   |
|              | <i>Zfp91</i>   | 0.092           | 0.239                   |
|              | <b>Mean</b>    | <b>0.110</b>    | <b>0.271</b>            |
| Cerebellum   | <i>Ap3d1</i>   | 0.048           | 0.135                   |
|              | <i>Cdc40</i>   | 0.059           | 0.146                   |
|              | <i>Gapdh</i>   | 0.074           | 0.168                   |
|              | <b>Mean</b>    | <b>0.061</b>    | <b>0.150</b>            |

<sup>A</sup> The coefficient of variation (CV) represents the variation of the normalised relative quantities of a reference gene across all samples. CV should be lower than 0.25 for stable reference genes.

<sup>B</sup> M is a value for the gene expression stability and should be lower than 0.5 for stable reference genes).

**Supplementary Table S.3. Assays on demand real-time PCR YAC**

| Gene                         | Assay ID       |
|------------------------------|----------------|
| <b>Reference genes</b>       |                |
| <i>Gapdh</i>                 | Mm99999915_g1  |
| <i>Hprt</i>                  | Mm00446968_m1  |
| <i>Hmbs</i>                  | Mm006660262_g1 |
| <b>Genes of interest</b>     |                |
| <i>Gabra1</i> ( $\alpha_1$ ) | Mm00439040_m1  |
| <i>Gabra2</i> ( $\alpha_2$ ) | Mm00433435_m1  |
| <i>Gabra3</i> ( $\alpha_3$ ) | Mm00433440_m1  |
| <i>Gabra4</i> ( $\alpha_4$ ) | Mm00802631_m1  |
| <i>Gabrb1</i> ( $\beta_1$ )  | Mm00433461_m1  |
| <i>Gabrb1</i> ( $\beta_2$ )  | Mm00433467_m1  |
| <i>Gabrd</i> ( $\delta$ )    | Mm00433476_m1  |
| <i>Gabrg1</i> ( $\gamma_1$ ) | Mm00439047_m1  |
| <i>Gabrg2</i> ( $\gamma_2$ ) | Mm00433489_m1  |
| <i>Gad1</i> *                | Mm00725661_s1  |
| <i>Slc6a1</i> *              | Mm00618601_m1  |
| <i>Slc6a11</i> *             | Mm00556476_m1  |
| <i>Aldh5a1</i> *             | Mm00553115_m1  |
| <i>Gphn</i> *                | Mm00556895_m1  |
| <b>Controls</b>              |                |
| <i>Map1b</i>                 | Mm00485261_m1  |
| <i>Fmr1</i>                  | Mm00484415_m1  |

\**Aldh5a1* (*Ssadh*), *Gad1* (GAD67), *Gphn* (*gephyrin*), *Slc6A1* (GAT1), *Slc6a11* (GAT4)

**Supplementary Table S.4. Reference gene stability in YAC rescue experiments**

| Reference gene | CV <sup>A</sup> | M (geNorm) <sup>B</sup> |
|----------------|-----------------|-------------------------|
| <i>Gapdh</i>   | 4.52            | 0.128                   |
| <i>Hprt</i>    | 4.36            | 0.128                   |
| <b>Mean</b>    | 4.44            | 0.128                   |

<sup>A</sup> The coefficient of variation (CV) represents the variation of the normalised relative quantities of a reference gene across all samples. CV should be lower than 0.25 for stable reference genes.

<sup>B</sup> M is a value for the gene expression stability and should be lower than 0.5 for stable reference genes.
